# Supplementary material
Source: PubMed Central journal article supplement (PMC555469)

(a)

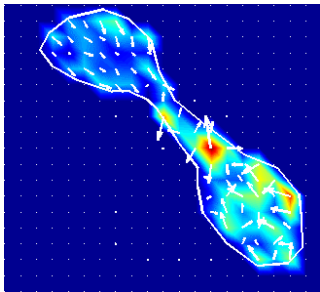

(b)

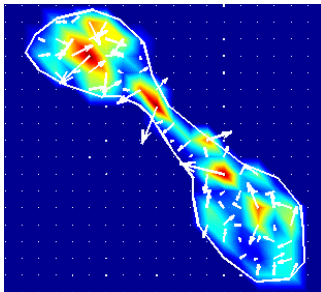

Supplement: pnas_102_12_4300__1.pdf [file pnas_102_12_4300__1.pdf]
